# Supplementary material for: Septin 9 amplification and isoform-specific expression in peritumoral and tumor breast tissue
Source: publisher site journal article supplement (doi:10.1515/hsz-2013-0247), 2013-10-10
Supplement: Supplementary file 1 [file j_hsz-2013-0247_suppl_004.doc]

**Supplementary Figure 1. *SEPT9* is amplified in high grade breast cancer patients.** A detailed quantification of the *SEPT9* copies per in each patient analyzed is displayed. Each box corresponds to a patient and is indicative of the maximum and minimum number of *SEPT9* copies per cell. We highlight well-differentiated patients in red, moderately-differentiated patients in blue and high grade patients in yellow.

**Supplementary Figure 2. Primers efficiency.** In each box we show the standard curve specific for the primer pairs indicated in black on the right side. The primer-specific efficiency is shown in red at the bottom of each standard curve.

**Supplementary Figure 3. Normalized *SEPT9_v1-v7* isoform-specific expression levels.** For the six matched samples we calculated the Ct value for each peritumoral and tumor tissue pair and plotted the folds of isoform-specific expression changes for each patient. The legend on the right indicates the isoform-specific color coding. Graph bars highlighted in dark grey in patients 28, 41 and 52) indicate bars that were excluded from the analysis due to low isoform-specific expression leading to skewing in the Ct analysis.
